# Supplementary material for: Role of CD4+ T-cells for regulating splenic myelopoiesis and monocyte differentiation after experimental myocardial infarction
Source: PubMed Central journal article supplement (PMC11008073; doi:10.1007/s00395-024-01035-3), 2024-03-04
Supplement: 395_2024_1035_MOESM1_ESM.pdf [file 395_2024_1035_MOESM1_ESM.pdf]

**Role of CD4<sup>+</sup> T-cells for regulating splenic myelopoiesis and monocyte differentiation after experimental myocardial infarction**

Nadine Gladow<sup>a,b\*</sup>, Claudia Hollmann<sup>c</sup>, Johannes Weirather<sup>d</sup>, Xin Ding<sup>a,b</sup>, Matthias Burkard<sup>a</sup>, Sabrina Uehlein<sup>e</sup>, Richa Bharti<sup>f</sup>, Konrad Förstner<sup>g,h</sup>, Thomas Kerkau<sup>c</sup>, Niklas Beyersdorf<sup>c</sup>, Stefan Frantz<sup>a,b</sup>, Gustavo Ramos<sup>a,b</sup>, Ulrich Hofmann<sup>a,b</sup>

a Department of Internal Medicine I, University Clinic Würzburg, Würzburg, Germany

b Comprehensive Heart Failure Centre, University Clinic Würzburg, Würzburg, Germany

c Institute for Virology and Immunobiology, University of Würzburg, Würzburg, Germany

d MorphoSys AGPlanegg, Germany

e current affiliation: Department of Cardiology and Angiology, Hannover Medical School, Hannover, Germany

f TUM Campus Straubing for Biotechnology and Sustainability, Weihenstephan-Triesdorf University of Applied Sciences, Straubing, Germany

g ZB MED-Information Centre for Life Sciences, Cologne, Germany

h Faculty of Information Science and Communication Studies, Cologne University of Applied Sciences, Cologne, Germany

**\*Corresponding author:**

e-mail: Gladow\_N@ukw.de

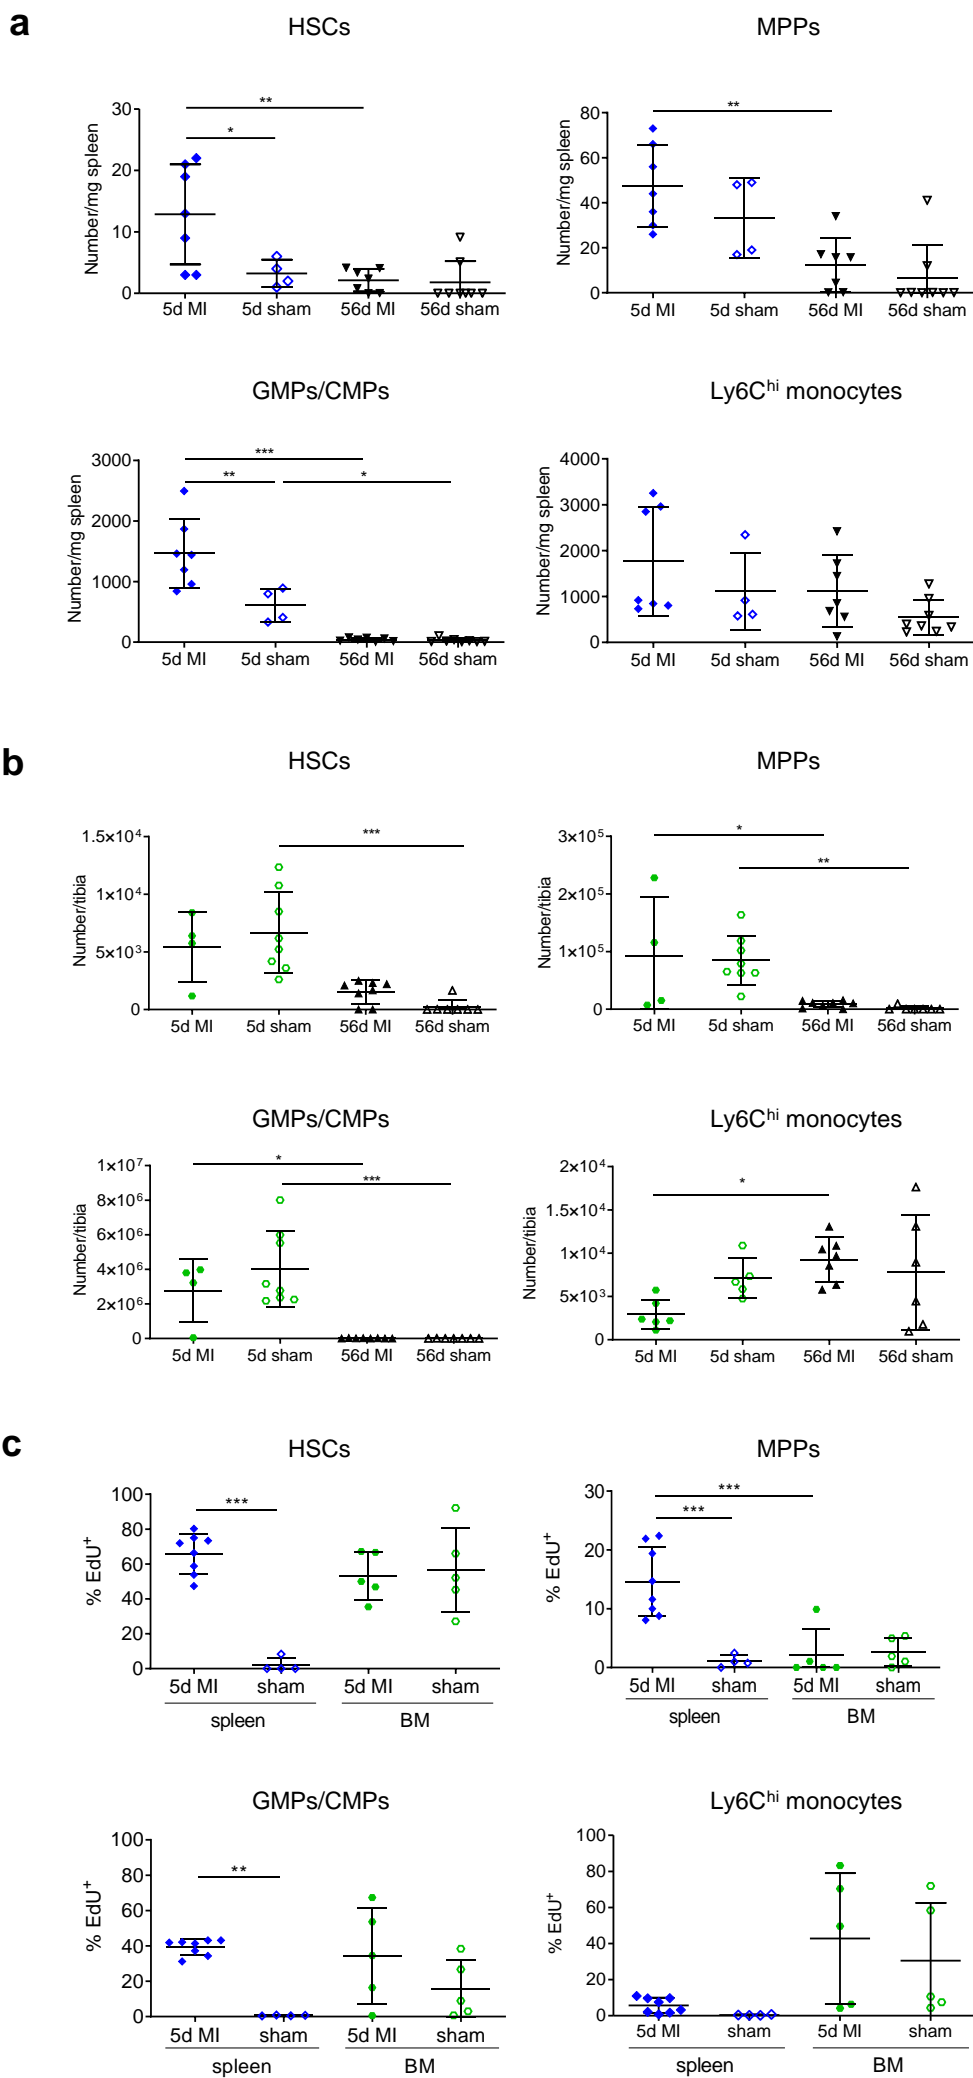

**Supplementary Fig. 1 Quantification and proliferation analysis of precursor cells and monocytes in the spleen and bone marrow of wild type (WT) mice after MI or sham surgery.** Absolute numbers of HSCs, MPPs, GMPs/CMPs, and monocytes in the spleen (a) and bone marrow (b) of WT mice 5 and 56 days after MI or sham operation. c In vivo proliferation of HSCs, MPPs, GMPs/CMPs, and monocytes in the spleen and BM 5 days after MI or sham operation. HSC = haematopoietic stem cell; MPP = multipotent progenitor; GMP = granulocyte-macrophage progenitor; CMP = common myeloid progenitor. Data are presented as the mean  $\pm$  SD. \* $P < 0.05$ , \*\* $P < 0.01$ , \*\*\* $P < 0.001$  (one-way ANOVA).

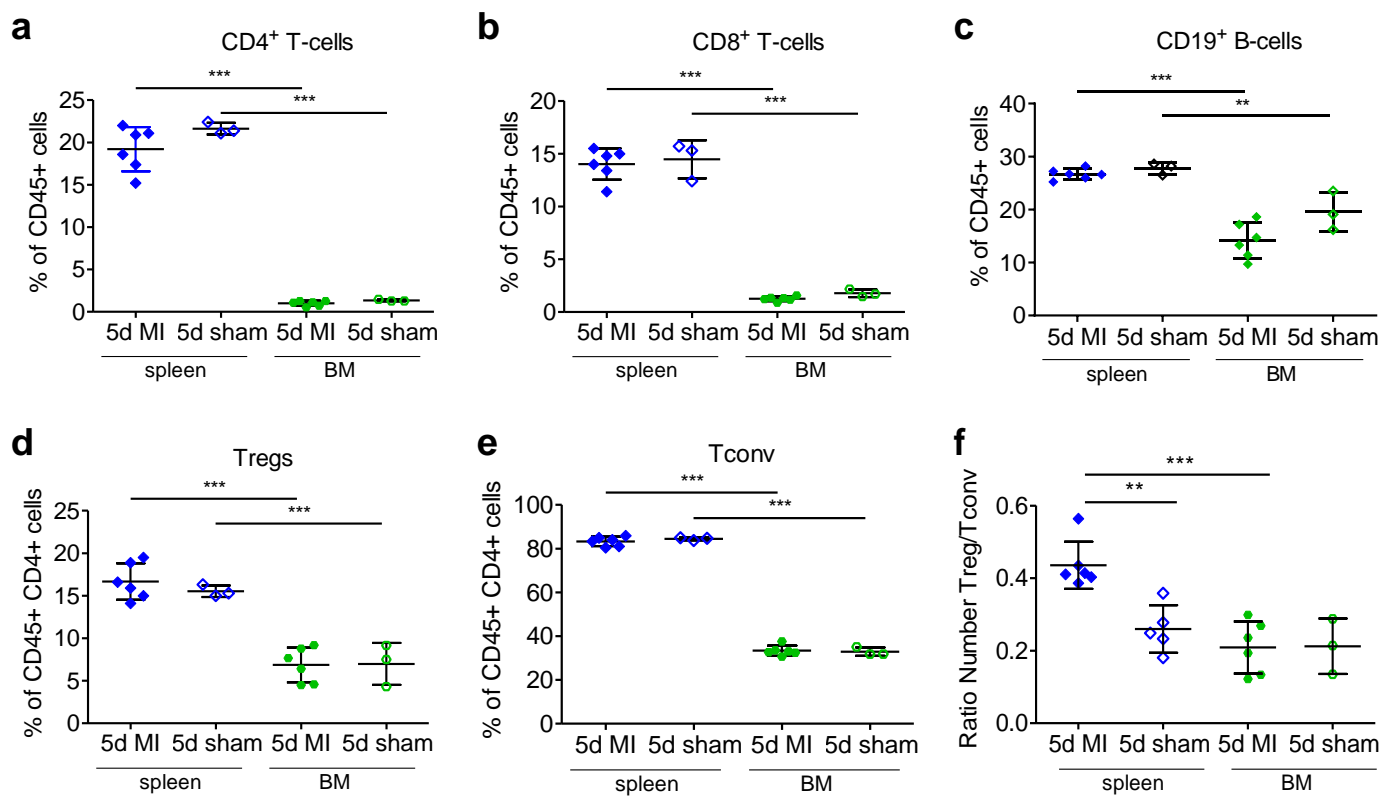

**Supplementary Fig. 2** Frequencies of cells in the spleen and bone marrow (BM) 5 days after MI or sham operation. CD4<sup>+</sup> (a), CD8<sup>+</sup> (b) and CD19<sup>+</sup> cells (c) among CD45<sup>+</sup> cells in the spleen and bone marrow (BM) 5 days after MI (n=6 per group) or sham operation (n=3 per group). d and e showing the frequencies of Tregs or Tconvs among CD45<sup>+</sup> CD4<sup>+</sup> T-cells in the spleen and BM of WT mice 5 days after MI. f Ratio of Treg/Tconv frequencies in the spleen or bone marrow of infarcted and sham-operated mice 5 days after sham or MI surgery. BM= bone marrow; MI = myocardial infarction. Data are presented as the mean ± SD. \*\*P<0.01, \*\*\*P<0.001 (one-way ANOVA).

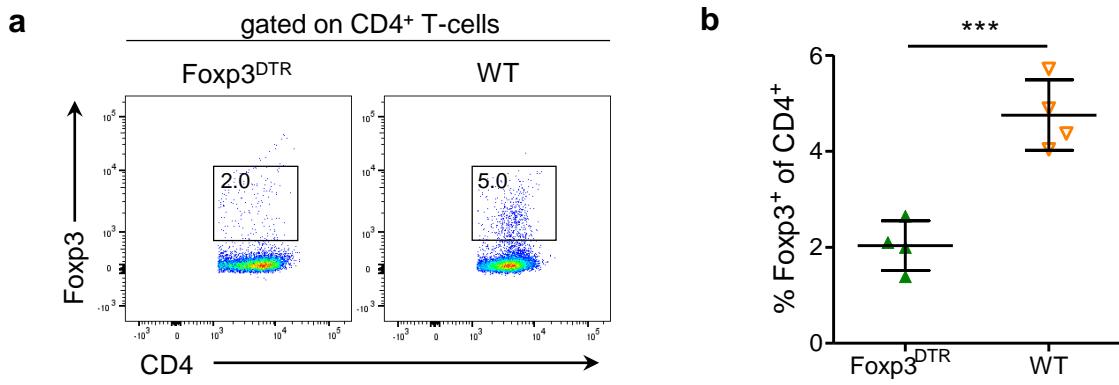

**Supplementary Fig. 3 Foxp3<sup>+</sup> T-cell depletion in the spleen.** **a** Representative fluorescence-activated cell sorting plots and **b** quantitative analysis showing the frequency of Foxp3<sup>+</sup> cells among CD4<sup>+</sup> T-cells in the spleen of WT and T-cell depleted mice (Foxp3<sup>DTR</sup>) 7 days after MI (n=4 per group). Data are mean ± SD. \*\*\*P<0.001 (**b** t-test)

MACS  
depletion of  
T- and B-cells

cell  
suspension  
(spleen)

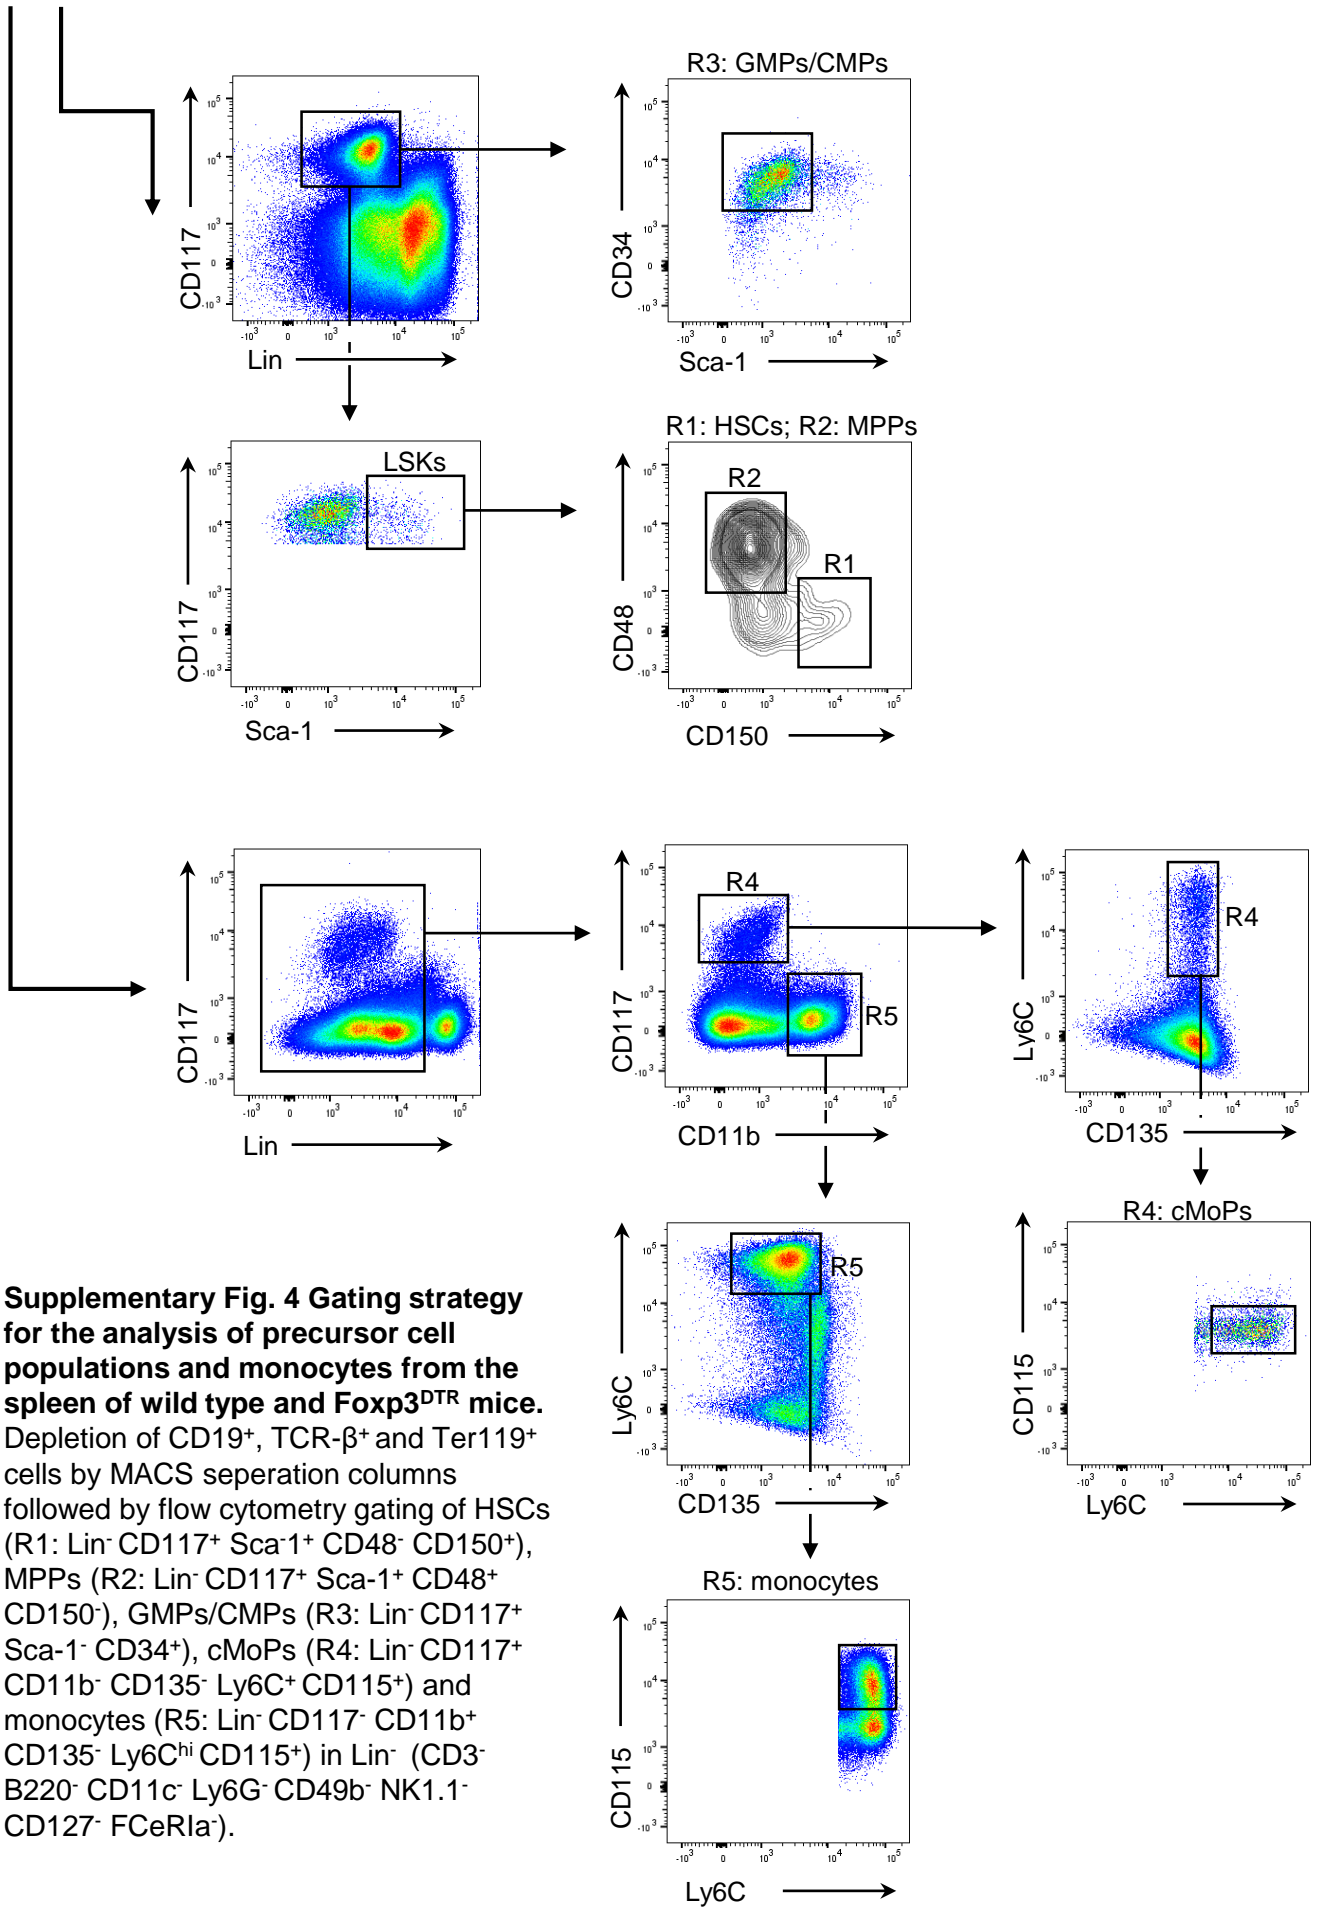

**Supplementary Fig. 4 Gating strategy for the analysis of precursor cell populations and monocytes from the spleen of wild type and  $Foxp3^{DTR}$  mice.** Depletion of  $CD19^+$ ,  $TCR-\beta^+$  and  $Ter119^+$  cells by MACS separation columns followed by flow cytometry gating of HSCs (R1:  $Lin^- CD117^+ Sca-1^+ CD48^- CD150^+$ ), MPPs (R2:  $Lin^- CD117^+ Sca-1^+ CD48^+ CD150^-$ ), GMPs/CMPs (R3:  $Lin^- CD117^+ Sca-1^- CD34^+$ ), cMoPs (R4:  $Lin^- CD117^+ CD11b^- CD135^- Ly6C^+ CD115^+$ ) and monocytes (R5:  $Lin^- CD117^- CD11b^+ CD135^- Ly6C^{hi} CD115^+$ ) in  $Lin^- (CD3^- B220^- CD11c^- Ly6G^- CD49b^- NK1.1^- CD127^- Fc\epsilon R1a^-)$ .

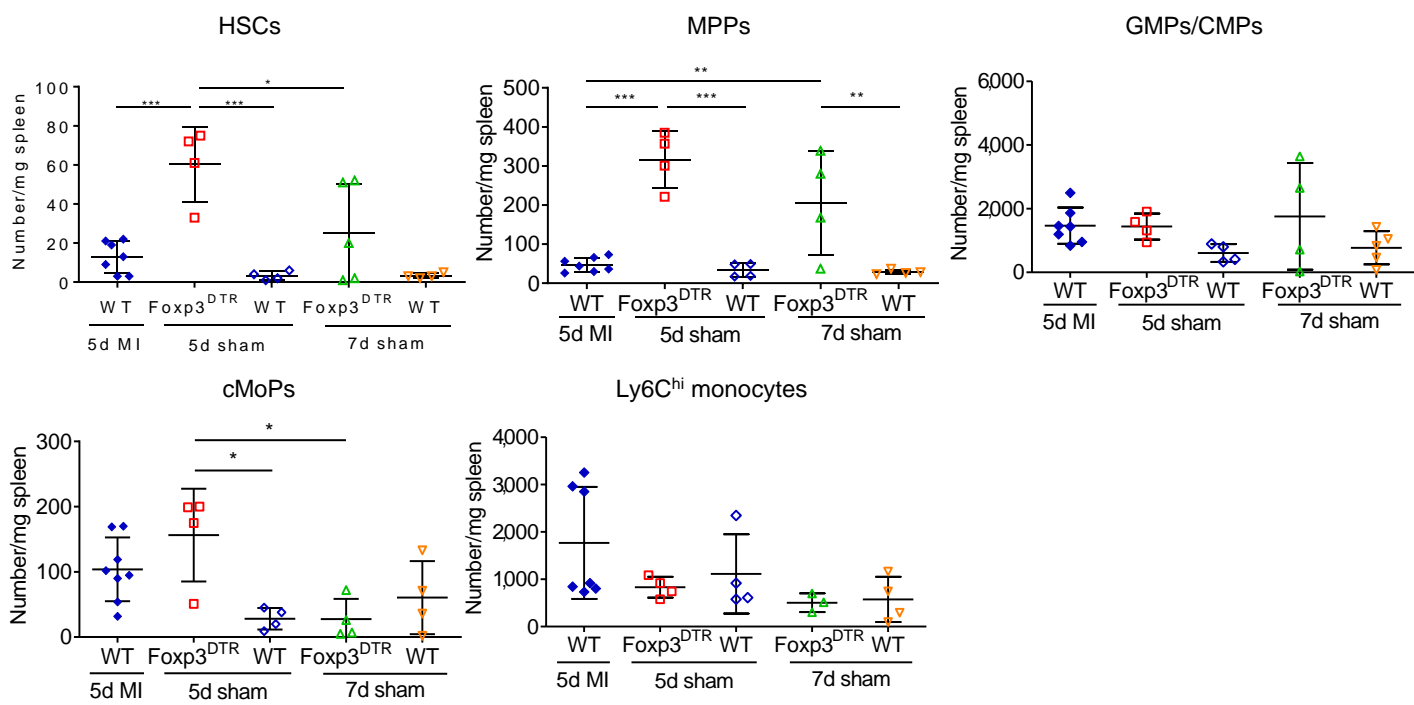

**Supplementary Fig. 5 Quantification of the numbers of HSCs, MPPs, GMPs/CMPs, cMoPs and monocytes in the spleens of WT and Treg-depleted mice (Foxp3<sup>DTR</sup>) at 5 and 7 days after MI or sham operation.** HSC, haematopoietic stem cell; MPP, multipotent progenitor; GMP, granulocyte-monocyte progenitor; CMP, common myeloid progenitor; cMoP, common monocyte progenitor. Data are presented as the mean  $\pm$  SD. \*P<0.05, \*\*P<0.01, \*\*\*P<0.001 (one-way ANOVA)

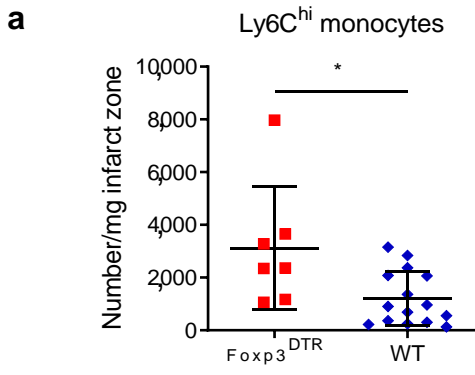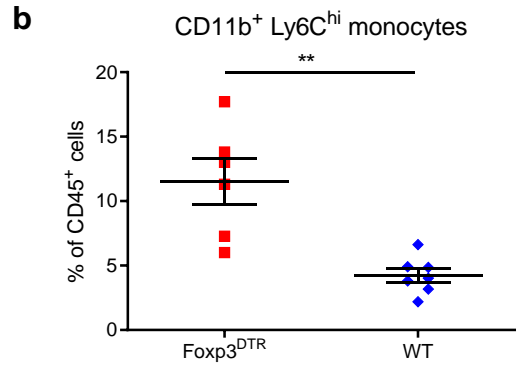

**Supplementary Fig. 6** Number of Ly6C<sup>hi</sup> monocytes in the myocardium (a) and blood (b) of Foxp3<sup>DTR</sup> and wild type (WT) mice 7 days after myocardial infarction. Data are mean  $\pm$  SD. \*P<0.05, \*\*>P<0.01 (U-test)

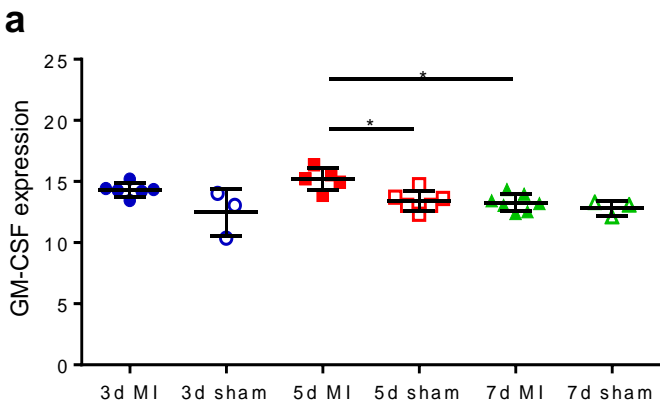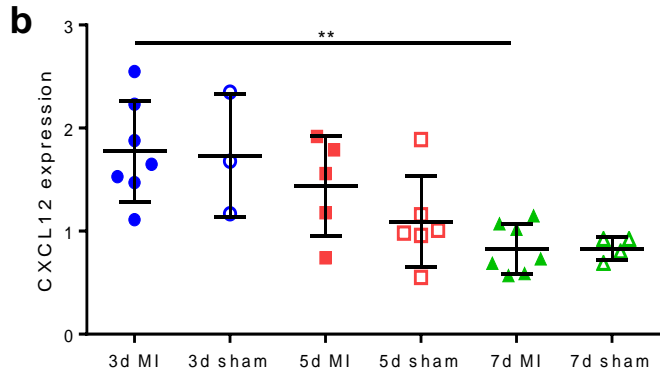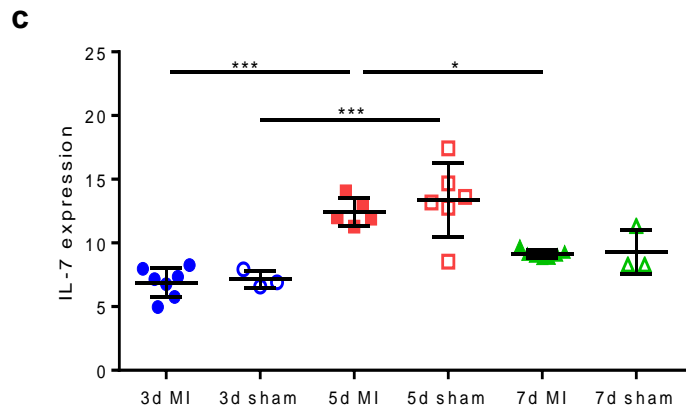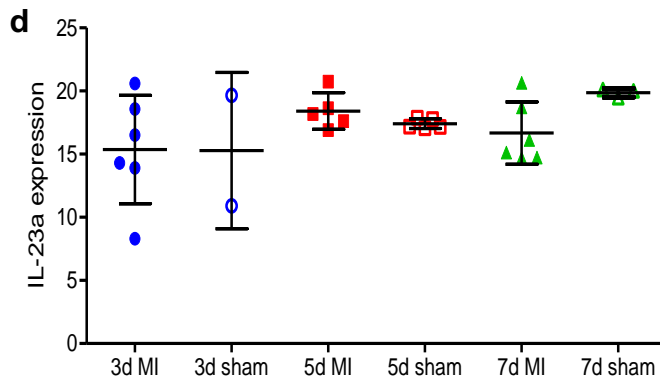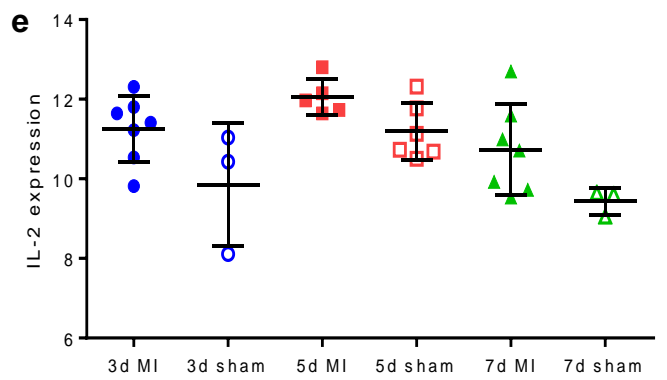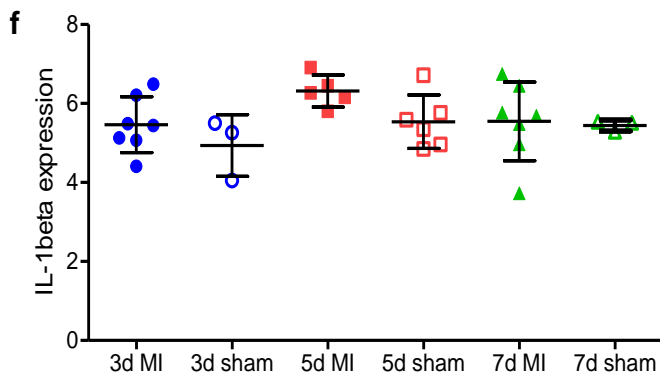

**Supplementary Fig. 7 Cytokine expression in the spleen 3, 5 or 7 days after myocardial infarction (MI) or sham operation.** Expression of GM-CSF (a) CXCL12 (b), IL-7 (c), IL23a (d), IL-2 (e) and IL-1beta (f) in the spleen of wild type mice after MI or sham surgery. Data are presented as the mean  $\pm$  SD. \* $P < 0.05$ , \*\* $P < 0.01$ , \*\*\* $P < 0.001$  (one-way ANOVA)



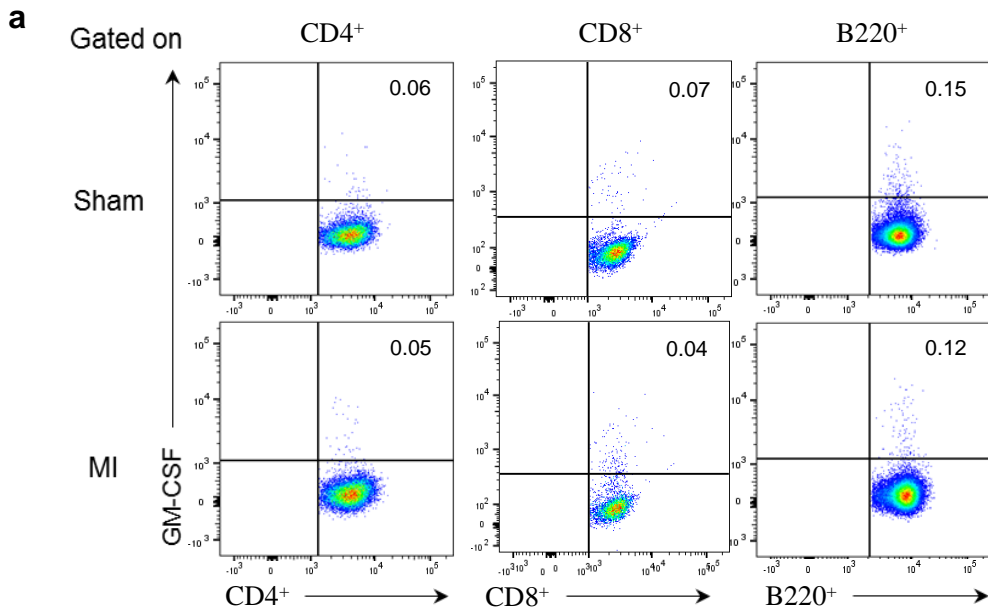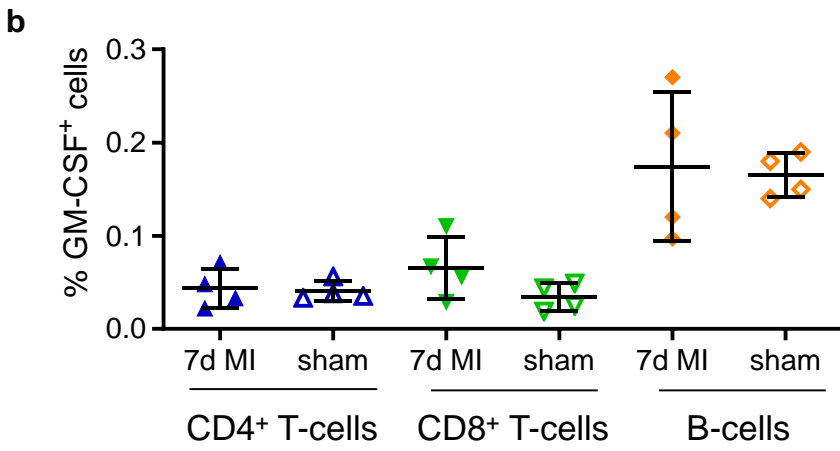

**Supplementary Fig. 8 GM-CSF expression in the spleen 7 days after myocardial infarction (MI) or sham operation.** Data are presented as the mean ± SD. not significant (t-test)

**a**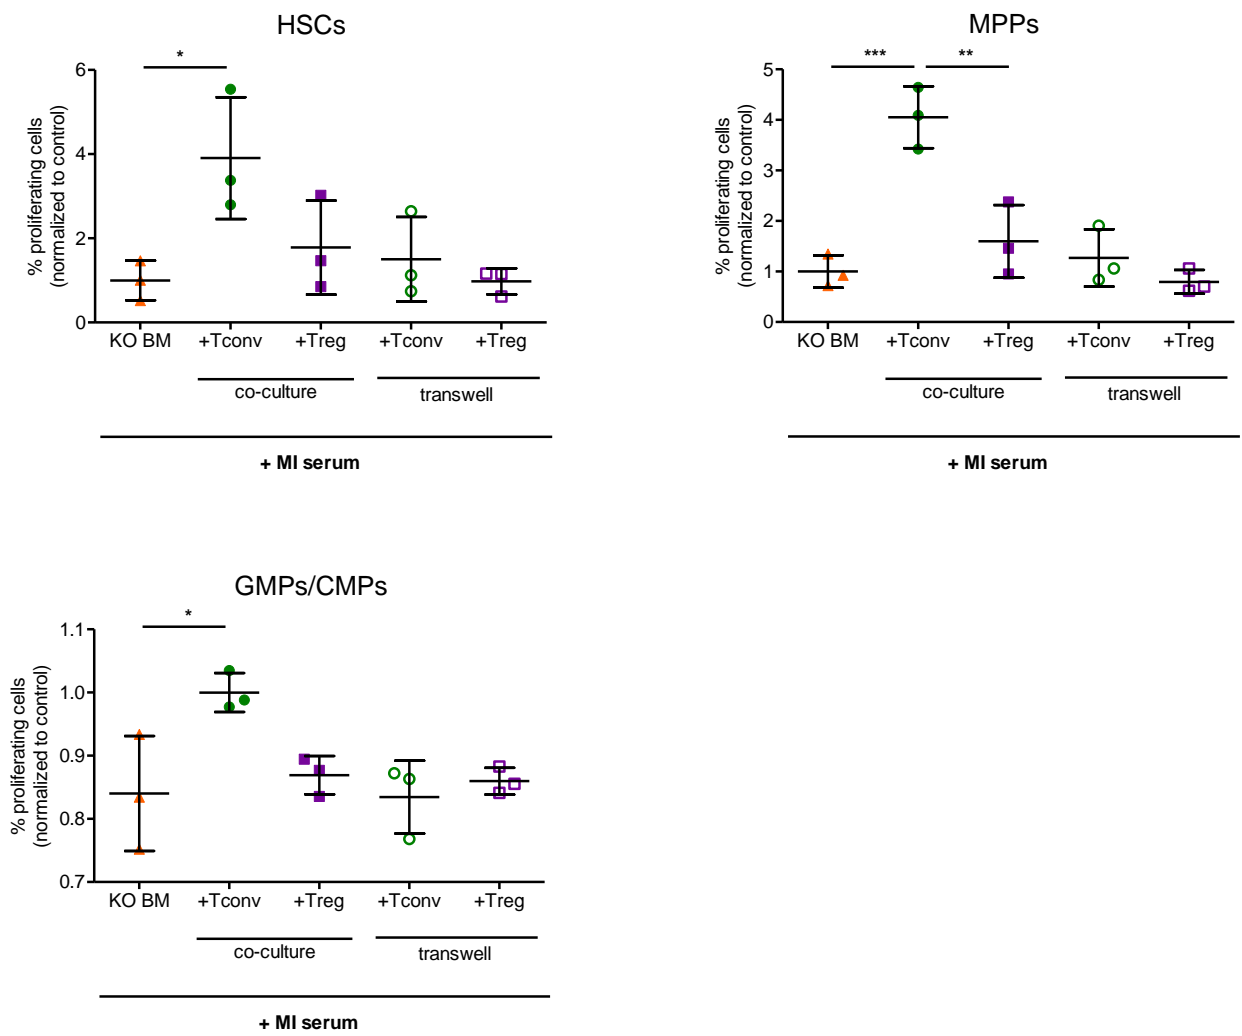**b**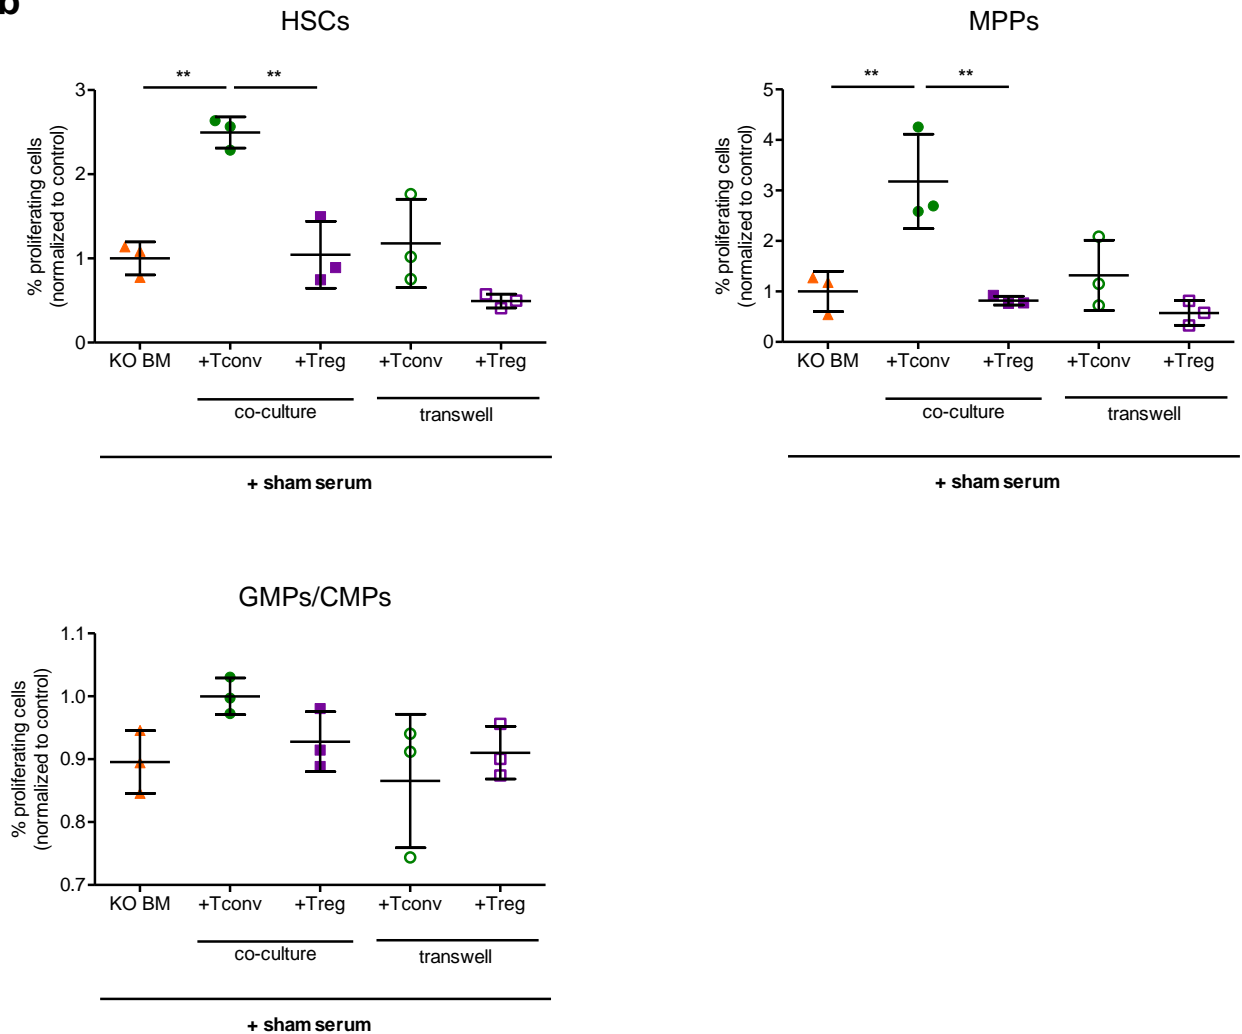

**Supplementary Fig. 9** *In vitro* culture of Tregs or Tconv isolated bone marrow cells from **CD4 KO mice**. The proliferative activity of CD4KO BM cells in culture with serum from 5d MI (a) or sham (b) animals was measured by CFSE staining. Data are presented as the mean  $\pm$  SD. \* $P < 0.05$ , \*\* $P < 0.01$ , \*\*\* $P < 0.001$  (one-way ANOVA)

**a**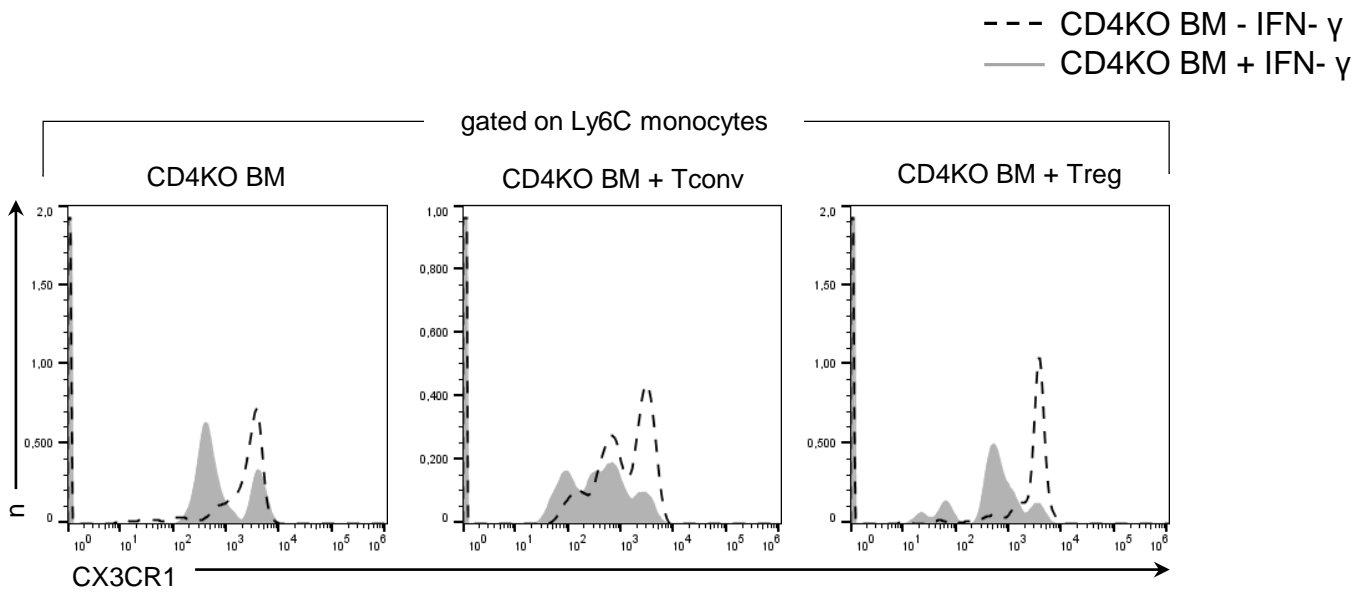**b**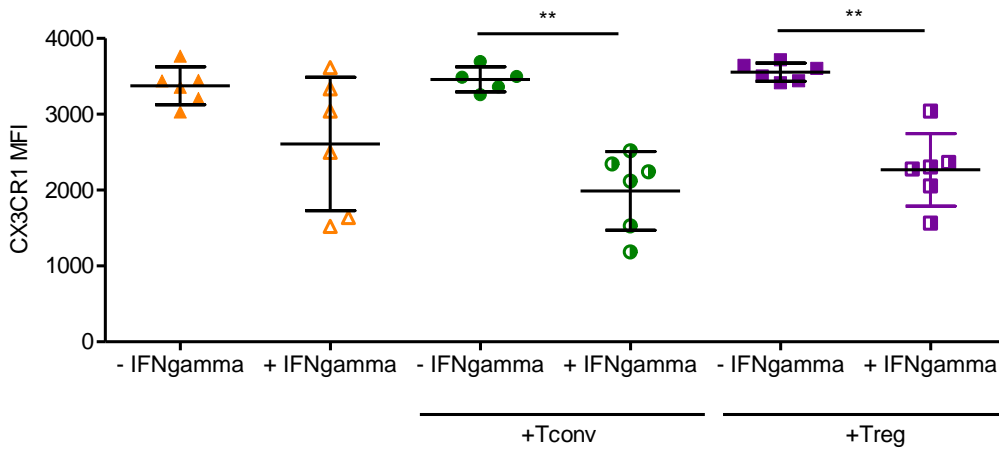

**Supplementary Fig. 10 *In vitro* expression of CX3CR1<sup>+</sup> on monocytes.**

**a** Representative fluorescence-activated cell sorting plots and **b** mean fluorescent intensity of CX3CR1<sup>+</sup> cells among Ly6C<sup>hi</sup> monocytes from CD4KO BM cultured for 72h in presence or absence of IFN-gamma and Tconv or Treg cells isolated from WT spleens. Data are mean  $\pm$  SD. \*\*P<0.01 (**b** t-test)

**Supplementary Table 1 Top 50 Upregulated (a) and downregulated (b) transcripts in splenic Ly6C<sup>high</sup> monocytes (sorted as CD11b<sup>+</sup> Ly6G<sup>-</sup> F4/80<sup>+</sup> Ly6C<sup>high</sup> CD115<sup>+</sup>) from WT mice 5 days after MI and sham surgery.** Positive values mean upregulation in MI as compared to sham. (n=4, 5d MI; n=3, sham surgery).

**a**

| Gene description                                                      | Gene symbol   | log2 fold change | adjusted p-value |
|-----------------------------------------------------------------------|---------------|------------------|------------------|
| RAD18 E3 ubiquitin protein ligase                                     | Rad18         | 0.67             | 1.00             |
| PRKC, apoptosis, WT1, regulator                                       | Pawr          | 0.57             | 1.00             |
| rhotekin 2                                                            | Rtkn2         | 0.57             | 1.00             |
| ankyrin repeat domain 37                                              | Ankrd37       | 0.56             | 1.00             |
| vascular endothelial growth factor C                                  | Vegfc         | 0.55             | 1.00             |
| membrane-spanning 4-domains, subfamily A, member 7                    | Ms4a7         | 0.54             | 1.00             |
| NADH dehydrogenase subunit 6                                          | ND6           | 0.54             | 1.00             |
| predicted gene 5617                                                   | Gm5617        | 0.52             | 1.00             |
| hairy and enhancer of split 7 (Drosophila)                            | Hes7          | 0.52             | 1.00             |
| FERM domain containing 5                                              | Frmd5         | 0.49             | 1.00             |
| succinate dehydrogenase complex assembly factor 1                     | Sdhaf1        | 0.49             | 1.00             |
| nudix (nucleoside diphosphate linked moiety X)-type motif 14          | Nudt14        | 0.48             | 1.00             |
| histone cluster 2, H2be                                               | Hist2h2be     | 0.48             | 1.00             |
| cytochrome c oxidase assembly factor 6                                | Coa6          | 0.48             | 1.00             |
| NADH dehydrogenase (ubiquinone) 1 alpha subcomplex, assembly factor 4 | Ndufaf4       | 0.47             | 1.00             |
| NF-kappaB repressing factor                                           | Nkrf          | 0.47             | 1.00             |
| RIKEN cDNA 1700006E09 gene                                            | 1700006E09Rik | 0.47             | 1.00             |
| POU domain, class 4, transcription factor 1                           | Pou4f1        | 0.46             | NA               |
| IQ motif containing GTPase activating protein 3                       | Iqgap3        | 0.46             | 1.00             |
| acid phosphatase 5, tartrate resistant                                | Acp5          | 0.46             | 1.00             |
| isochorismatase domain containing 2b                                  | Isoc2b        | 0.45             | 1.00             |
| heat shock transcription factor family member 5                       | Hsf5          | 0.45             | 1.00             |
| TBC1 domain family, member 30                                         | Tbc1d30       | 0.45             | 1.00             |
| barrier to autointegration factor 1                                   | Banf1         | 0.44             | 1.00             |
| B cell leukemia/lymphoma 2                                            | Bcl2          | 0.44             | 1.00             |
| minichromosome maintenance deficient 10 (S. cerevisiae)               | Mcm10         | 0.44             | 1.00             |
| elongator acetyltransferase complex subunit 6                         | Elp6          | 0.44             | 1.00             |
| solute carrier family 36 (proton/amino acid symporter), member 3      | Slc36a3       | 0.44             | 1.00             |
| bora, aurora kinase A activator                                       | Bora          | 0.44             | 1.00             |
| predicted gene, 20594                                                 | Gm20594       | 0.43             | 1.00             |
| ribonuclease H2, subunit B                                            | Rnaseh2b      | 0.43             | 1.00             |
| mitochondrial ribosomal protein L43                                   | Mrpl43        | 0.43             | 1.00             |
| c-mer proto-oncogene tyrosine kinase                                  | Mertk         | 0.43             | 1.00             |
| ribosomal protein, large, P1                                          | Rplp1         | 0.43             | 1.00             |
| zinc finger protein 1                                                 | Zfp1          | 0.43             | 1.00             |
| transmembrane protein 203                                             | Tmem203       | 0.43             | 1.00             |
| histone cluster 1, H2ba                                               | Hist1h2ba     | 0.43             | 1.00             |
| ATP-binding cassette, sub-family A (ABC1), member 1                   | Abca1         | 0.43             | 1.00             |
| RIKEN cDNA 3830403N18 gene                                            | 3830403N18Rik | 0.43             | 1.00             |
| cyclin-dependent kinase inhibitor 2C (p18, inhibits CDK4)             | Cdkn2c        | 0.43             | 1.00             |
| eosinophil-associated, ribonuclease A family, member 1                | Ear1          | 0.43             | 1.00             |
| POU domain, class 2, transcription factor 3                           | Pou2f3        | 0.42             | 1.00             |
| apolipoprotein C-I                                                    | Apoc1         | 0.42             | 1.00             |
| mutY homolog (E. coli)                                                | Mutyh         | 0.42             | 1.00             |
| phorbol-12-myristate-13-acetate-induced protein 1                     | Pmaip1        | 0.42             | 1.00             |
| thyroid hormone receptor interactor 13                                | Trip13        | 0.42             | 1.00             |
| proline rich 11                                                       | Prr11         | 0.41             | 1.00             |
| budding uninhibited by benzimidazoles 1 homolog (S. cerevisiae)       | Bub1          | 0.41             | 1.00             |
| mitochondrial ribosomal protein L22                                   | Mrpl22        | 0.41             | 1.00             |
| fat storage-inducing transmembrane protein 2                          | Fitm2         | 0.41             | 1.00             |

The table continues on the next page.

**Continuation of Supplementary Table 1 Top 50 Upregulated (a) and downregulated (b) transcripts in splenic Ly6C<sup>high</sup> monocytes (sorted as CD11b<sup>+</sup> Ly6G<sup>-</sup> F4/80<sup>+</sup> Ly6C<sup>high</sup> CD115<sup>+</sup>) from WT mice 5 days after MI and sham surgery.** Positive values mean upregulation in MI as compared to sham. (n=4, 5d MI; n=3, sham surgery).

**b**

| Gene description                                                           | Gene symbol  | log 2 fold change | adjusted p-value |
|----------------------------------------------------------------------------|--------------|-------------------|------------------|
| adhesion G protein-coupled receptor G1                                     | Adgrg1       | -0,75             | 1,00             |
| high mobility group nucleosomal binding domain 3                           | Hmgn3        | -0,68             | 1,00             |
| GATA binding protein 2                                                     | Gata2        | -0,66             | 1,00             |
| epidermal growth factor receptor                                           | Egfr         | -0,64             | 1,00             |
| vomer nasal 2, receptor 21                                                 | Vmn2r21      | -0,62             | 1,00             |
| transmembrane protease, serine 11f                                         | Tmprss11f    | -0,54             | 1,00             |
| colony stimulating factor 1 (macrophage)                                   | Csf1         | -0,53             | 1,00             |
| actin-binding LIM protein 2                                                | Ablim2       | -0,53             | 1,00             |
| nephronophthisis 4 (juvenile) homolog (human)                              | Nphp4        | -0,53             | 1,00             |
| prickle homolog 3 (Drosophila)                                             | Prickle3     | -0,53             | 1,00             |
| polymerase (RNA) III (DNA directed) polypeptide D                          | Polr3d       | -0,52             | 1,00             |
| sphingomyelin synthase 2                                                   | Sgms2        | -0,52             | 1,00             |
| sushi, nidogen and EGF-like domains 1                                      | Sned1        | -0,52             | 1,00             |
| vomer nasal 2, receptor 22                                                 | Vmn2r22      | -0,51             | 1,00             |
| vomer nasal 2, receptor 20                                                 | Vmn2r20      | -0,51             | 1,00             |
| hemogen                                                                    | Hemgn        | -0,50             | NA               |
| polycystic kidney and hepatic disease 1-like 1                             | Pkhd11       | -0,50             | 1,00             |
| chromobox 6                                                                | Cbx6         | -0,50             | 1,00             |
| erythroblast membrane-associated protein                                   | Ermap        | -0,50             | 1,00             |
| predicted gene 14322                                                       | Gm14322      | -0,50             | 1,00             |
| fibronectin type III and SPRY domain containing 2                          | Fsd2         | -0,50             | 1,00             |
| glycoprotein m6b                                                           | Gpm6b        | -0,49             | NA               |
| carbohydrate (chondroitin 6/keratan) sulfotransferase 3                    | Chst3        | -0,49             | 1,00             |
| neuronal pentraxin chromo domain                                           | Npcd         | -0,49             | 1,00             |
| chemokine (C-X-C motif) ligand 9                                           | Cxcl9        | -0,49             | 1,00             |
| uncharacterized LOC101055912                                               | LOC101055912 | -0,49             | 1,00             |
| serine peptidase inhibitor, Kazal type 2                                   | Spink2       | -0,48             | 1,00             |
| target of myb1-like 1 (chicken)                                            | Tom1l1       | -0,48             | 1,00             |
| metastasis suppressor 1                                                    | Mtss1        | -0,48             | 1,00             |
| peroxisomal biogenesis factor 11 alpha                                     | Pex11a       | -0,48             | 1,00             |
| calcium channel, voltage-dependent, R type, alpha 1E subunit               | Cacna1e      | -0,48             | NA               |
| predicted gene 7120                                                        | Gm7120       | -0,48             | 1,00             |
| peptidyl arginine deiminase, type IV                                       | Padi4        | -0,47             | 1,00             |
| enkurin, TRPC channel interacting protein                                  | Enkur        | -0,47             | 1,00             |
| ADP-ribosylation factor-like 3                                             | Arl3         | -0,47             | 1,00             |
| coiled-coil domain containing 7B                                           | Ccdc7b       | -0,46             | 1,00             |
| tumor necrosis factor alpha induced protein 6                              | Tnfaip6      | -0,46             | 1,00             |
| par-6 family cell polarity regulator gamma                                 | Pard6g       | -0,46             | NA               |
| serine (or cysteine) peptidase inhibitor, clade C (antithrombin), member 1 | Serpinc1     | -0,46             | 1,00             |
| RAB44, member RAS oncogene family                                          | Rab44        | -0,46             | 1,00             |
| dematin actin binding protein                                              | Dmtn         | -0,46             | 1,00             |
| Ets2 repressor factor                                                      | Erf          | -0,45             | 1,00             |
| family with sequence similarity 189, member A2                             | Fam189a2     | -0,45             | 1,00             |
| prostaglandin E synthase                                                   | Ptges        | -0,45             | 1,00             |
| PRA1 domain family 2                                                       | Praf2        | -0,45             | 1,00             |
| cytochrome P450, family 19, subfamily a, polypeptide 1                     | Cyp19a1      | -0,45             | 1,00             |
| solute carrier family 4 (anion exchanger), member 8                        | Slc4a8       | -0,45             | 1,00             |
| JAZF zinc finger 1                                                         | Jazf1        | -0,45             | 1,00             |
| sialic acid binding Ig-like lectin G                                       | Siglecg      | -0,45             | 1,00             |
| family with sequence similarity 89, member A                               | Fam89a       | -0,45             | 1,00             |

**Supplementary Table 2 Top 50 up- (a) and downregulated (b) transcripts in splenic Ly6C<sup>high</sup> monocytes (sorted as CD11b<sup>+</sup> Ly6G<sup>-</sup> F4/80<sup>+</sup> Ly6C<sup>high</sup> CD115<sup>+</sup>) from Foxp3<sup>DTR</sup> and WT mice 5 days after MI. Positive values mean upregulation in Foxp3<sup>DTR</sup> as compared to WT (n=4 animals per group).**

| a | Gene description                                             | Gene symbol   | log2 fold change | Adjusted p-value |
|---|--------------------------------------------------------------|---------------|------------------|------------------|
|   | predicted gene 4951                                          | Gm4951        | 5.20             | 3.16E-102        |
|   | interferon inducible GTPase 1                                | ligp1         | 4.93             | 1.25E-69         |
|   | serine (or cysteine) peptidase inhibitor, clade A, member 3F | Serpina3f     | 3.18             | 2.64E-38         |
|   | guanylate-binding protein 10                                 | Gbp10         | 2.97             | 2.70E-36         |
|   | guanylate binding protein 4                                  | Gbp4          | 2.97             | 2.60E-30         |
|   | guanylate binding protein 6                                  | Gbp6          | 2.95             | 1.27E-32         |
|   | RIKEN cDNA F830016B08 gene                                   | F830016B08Rik | 2.93             | 8.55E-18         |
|   | chemokine (C-X-C motif) ligand 9                             | Cxcl9         | 2.83             | 1.67E-26         |
|   | guanylate binding protein 2                                  | Gbp2          | 2.81             | 2.95E-24         |
|   | guanylate binding protein 2b                                 | Gbp2b         | 2.66             | 1.07E-17         |
|   | serine (or cysteine) peptidase inhibitor, clade A, member 3I | Serpina3i     | 2.60             | 3.45E-16         |
|   | predicted gene 4841                                          | Gm4841        | 2.57             | 1.00E-11         |
|   | T cell specific GTPase 1                                     | Tgtp1         | 2.51             | 1.14E-21         |
|   | T cell specific GTPase 2                                     | Tgtp2         | 2.50             | 3.42E-19         |
|   | guanylate binding protein 5                                  | Gbp5          | 2.31             | 1.87E-15         |
|   | guanylate-binding protein 8                                  | Gbp8          | 2.26             | 2.17E-41         |
|   | cytokine inducible SH2-containing protein                    | Cish          | 2.17             | 8.62E-09         |
|   | guanylate-binding protein 9                                  | Gbp9          | 2.15             | 3.65E-38         |
|   | serine (or cysteine) peptidase inhibitor, clade A, member 3N | Serpina3n     | 2.12             | 2.19E-07         |
|   | serine protease inhibitor, Kunitz type 1                     | Spint1        | 2.08             | 5.42E-09         |
|   | guanylate binding protein 7                                  | Gbp7          | 1.98             | 1.32E-17         |
|   | mast cell protease 8                                         | Mcpt8         | 1.96             | 1.78E-06         |
|   | matrix metalloproteinase 25                                  | Mmp25         | 1.93             | 1.86E-08         |
|   | 5-hydroxytryptamine (serotonin) receptor 7                   | Htr7          | 1.87             | 3.36E-08         |
|   | Der1-like domain family, member 3                            | Derl3         | 1.87             | 1.14E-05         |
|   | lymphocyte antigen 6 complex, locus A                        | Ly6a          | 1.84             | 1.29E-12         |
|   | protease, serine 34                                          | Prss34        | 1.75             | 2.66E-05         |
|   | fibrillin 1                                                  | Fbn1          | 1.73             | 1.71E-09         |
|   | RIKEN cDNA 1500009L16 gene                                   | 1500009L16Rik | 1.68             | 1.39E-04         |
|   | interleukin 18 binding protein                               | Il18bp        | 1.61             | 2.69E-14         |
|   | transcription factor EC                                      | Tfec          | 1.57             | 9.18E-10         |
|   | secreted and transmembrane 1A                                | Sectm1a       | 1.57             | 1.87E-05         |
|   | CD274 antigen                                                | Cd274         | 1.55             | 4.83E-11         |
|   | interleukin 1 receptor-like 2                                | Il1rl2        | 1.54             | 4.22E-07         |
|   | interleukin 12 receptor, beta 1                              | Il12rb1       | 1.51             | 3.96E-04         |
|   | solute carrier family 30 (zinc transporter), member 4        | Slc30a4       | 1.50             | 5.57E-08         |
|   | guanylate binding protein 3                                  | Gbp3          | 1.47             | 2.41E-08         |
|   | interferon gamma induced GTPase                              | Igtp          | 1.47             | 1.67E-10         |
|   | tumor necrosis factor, alpha-induced protein 8-like 3        | Tnfaip8l3     | 1.46             | 5.66E-05         |
|   | solute carrier organic anion transporter family, member 4C1  | Slco4c1       | 1.41             | 6.35E-04         |
|   | pyrophosphatase (inorganic) 1                                | Ppa1          | 1.39             | 1.03E-08         |
|   | granzyme K                                                   | Gzmk          | 1.38             | 1.19E-03         |
|   | leucine aminopeptidase 3                                     | Lap3          | 1.38             | 4.85E-13         |
|   | solute carrier protein family 52, member 3                   | Slc52a3       | 1.37             | 1.13E-09         |
|   | cadherin 1                                                   | Cdh1          | 1.34             | 8.13E-06         |
|   | interferon gamma inducible protein 47                        | Ifi47         | 1.33             | 7.94E-08         |
|   | protein tyrosine phosphatase, non-receptor type 13           | Ptpn13        | 1.33             | 1.13E-04         |
|   | caspase 12                                                   | Casp12        | 1.32             | 5.52E-06         |
|   | histamine receptor H2                                        | Hrh2          | 1.32             | 4.34E-08         |
|   | TBC1 domain family, member 2                                 | Tbc1d2        | 1.32             | 7.37E-11         |

The table continues on the next page.

**Continuation of Supplementary Table 2 Top 50 up- (a) and downregulated (b) transcripts in splenic Ly6C<sup>high</sup> monocytes (sorted as CD11b<sup>+</sup> Ly6G<sup>-</sup> F4/80<sup>+</sup> Ly6C<sup>high</sup> CD115<sup>+</sup>) from Foxp3<sup>DTR</sup> and WT mice 5 days after MI. Positive values mean upregulation in Foxp3<sup>DTR</sup> as compared to WT (n=4 animals per group).**

**b**

| Gene description                                                             | Gene symbol   | log2 fold change | Adjusted p-value |
|------------------------------------------------------------------------------|---------------|------------------|------------------|
| integrin alpha 8                                                             | Itga8         | -2.00            | 7.51E-12         |
| hydroxyprostaglandin dehydrogenase 15 (NAD)                                  | Hpgd          | -1.95            | 4.83E-11         |
| apolipoprotein E                                                             | Apoe          | -1.86            | 2.00E-09         |
| G protein-coupled receptor 83                                                | Gpr83         | -1.81            | 3.60E-06         |
| suppressor of glucose, autophagy associated 1                                | Soga1         | -1.69            | 2.97E-18         |
| ATP-binding cassette, sub-family A (ABC1), member 8a                         | Abca8a        | -1.64            | 5.24E-06         |
| adhesion G protein-coupled receptor E4                                       | Adgre4        | -1.63            | 1.48E-13         |
| platelet derived growth factor, B polypeptide                                | Pdgfb         | -1.58            | 6.30E-06         |
| predicted gene 1673                                                          | Gm1673        | -1.54            | 8.67E-05         |
| hairy and enhancer of split 1 (Drosophila)                                   | Hes1          | -1.54            | 3.51E-05         |
| caspase recruitment domain family, member 10                                 | Card10        | -1.50            | 1.92E-07         |
| chemokine (C-X3-C motif) receptor 1                                          | Cx3cr1        | -1.50            | 4.31E-15         |
| angiotensin I converting enzyme (peptidyl-dipeptidase A) 1                   | Ace           | -1.46            | 1.94E-12         |
| transmembrane protein 176A                                                   | Tmem176a      | -1.45            | 2.72E-14         |
| inositol hexaphosphate kinase 3                                              | Ip6k3         | -1.43            | 3.78E-09         |
| CD163 antigen                                                                | Cd163         | -1.42            | 3.74E-04         |
| adhesion G protein-coupled receptor L3                                       | Adgrl3        | -1.42            | 2.02E-05         |
| Von Willebrand factor homolog                                                | Vwf           | -1.42            | 1.37E-08         |
| acyl-CoA synthetase short-chain family member 1                              | Acss1         | -1.41            | 5.00E-09         |
| solute carrier family 46, member 3                                           | Slc46a3       | -1.41            | 1.24E-06         |
| sciellin                                                                     | Scel          | -1.40            | 5.38E-08         |
| signal transducing adaptor family member 1                                   | Stap1         | -1.40            | 2.97E-11         |
| CD209a antigen                                                               | Cd209a        | -1.38            | 1.32E-03         |
| FMS-like tyrosine kinase 3                                                   | Flt3          | -1.37            | 1.73E-04         |
| transmembrane protein 176B                                                   | Tmem176b      | -1.36            | 1.31E-06         |
| thrombospondin 1                                                             | Thbs1         | -1.35            | 7.36E-05         |
| wingless-type MMTV integration site family, member 11                        | Wnt11         | -1.33            | NA               |
| myosin XVIIIb                                                                | Myo18b        | -1.31            | 9.08E-06         |
| ring finger protein 150                                                      | Rnf150        | -1.27            | 2.29E-04         |
| nuclear receptor subfamily 4, group A, member 1                              | Nr4a1         | -1.27            | 5.71E-10         |
| ATP-binding cassette, sub-family A (ABC1), member 6                          | Abca6         | -1.27            | 5.84E-04         |
| whirlin                                                                      | Whrn          | -1.27            | 1.56E-05         |
| Spi-C transcription factor (Spi-1/PU.1 related)                              | Spic          | -1.26            | 7.14E-04         |
| pleckstrin homology domain containing, family H (with MyTH4 domain) member 3 | Plekhh3       | -1.24            | 4.63E-04         |
| collagen, type IV, alpha 1                                                   | Col4a1        | -1.24            | 3.49E-04         |
| RIKEN cDNA A930011G23 gene                                                   | A930011G23Rik | -1.22            | 2.44E-03         |
| tissue inhibitor of metalloproteinase 2                                      | Timp2         | -1.22            | 6.92E-21         |
| sphingosine-1-phosphate receptor 5                                           | S1pr5         | -1.21            | 9.51E-07         |
| potassium voltage-gated channel, subfamily Q, member 3                       | Kcnq3         | -1.21            | 4.53E-04         |
| frizzled homolog 1 (Drosophila)                                              | Fzd1          | -1.19            | 9.03E-03         |
| POU domain, class 4, transcription factor 1                                  | Pou4f1        | -1.19            | NA               |
| arylsulfatase i                                                              | Arsi          | -1.19            | 6.23E-04         |
| patched domain containing 1                                                  | Ptchd1        | -1.18            | NA               |
| retrotransposon gag domain containing 4                                      | Rgag4         | -1.17            | 2.65E-06         |
| calcium channel, voltage-dependent, alpha 1F subunit                         | Cacna1f       | -1.17            | 6.24E-03         |
| T cell acute lymphocytic leukemia 2                                          | Tal2          | -1.16            | NA               |
| pyrimidineric receptor P2Y, G-protein coupled, 6                             | P2ry6         | -1.15            | 3.80E-06         |
| ATP-binding cassette, sub-family A (ABC1), member 1                          | Abca1         | -1.15            | 1.54E-04         |
| nuclear receptor subfamily 1, group D, member 2                              | Nr1d2         | -1.15            | 8.56E-06         |
| cadherin 22                                                                  | Cdh22         | -1.14            | 4.43E-03         |
